# Supplementary material for: Face identity coding in the deep neural network and primate brain
Source: PubMed Central journal article supplement (PMC9209415; doi:10.1038/s42003-022-03557-9), 2022-06-20
Supplement: 42003_2022_3557_MOESM10_ESM.pdf [file 42003_2022_3557_MOESM10_ESM.pdf]

## **Description of Additional Supplementary Files**

**File name:** Supplementary Data 1

**Description:** Source data for generating Fig. 1.

**File name:** Supplementary Data 2

**Description:** Source data for generating Fig. 2.

**File name:** Supplementary Data 3

**Description:** Source data for generating Fig. 4.

**File name:** Supplementary Data 4

**Description:** Source data for generating Fig. 5.

**File name:** Supplementary Data 5

**Description:** Source data for generating Fig. 6.

**File name:** Supplementary Data 6

**Description:** Source data for generating Fig. 7.

**File name:** Supplementary Data 7

**Description:** Source data for generating Fig. 8.
